# Supplementary material for: Gastric Acid Suppression Therapy and Its Association with Peritoneal Dialysis–Associated Peritonitis in the Peritoneal Dialysis Outcomes and Practice Patterns Study (PDOPPS)
Source: PubMed Central journal article supplement — Kidney360. 2023 Nov 28;5(3):370–9. doi: 10.34067/KID.0000000000000325 (PMC11000729; doi:10.34067/kid.0000000000000325), 2023-11-28
Supplement: kidney360-5-370-s001.pdf [file kidney360-5-370-s001.pdf]

**Gastric acid suppression therapy and its association with peritoneal-dialysis associated peritonitis in the Peritoneal Dialysis Outcomes and Practice Patterns Study (PDOPPS)**

Supplemental Tables, Figures

**Supplemental Table 1.** Peritonitis organism classifications

| <b>Organism</b>                                                      | <b>Type</b>      | <b>Enteric</b> |
|----------------------------------------------------------------------|------------------|----------------|
| <i>Acinetobacter</i> species                                         | Gram-negative    |                |
| Anaerobic bacteria (Other)                                           | Others           | x              |
| <i>Bacillus</i> species                                              | Gram-positive    | x              |
| <i>Bacteroides</i> (Anaerobe)                                        | Others           | x              |
| <i>Candida albicans</i>                                              | Yeast            |                |
| <i>Candida</i> , Other                                               | Yeast            |                |
| <i>Citrobacter</i> species                                           | Gram-negative    | x              |
| Coagulase-negative staphylococci – <i>Staphylococcus epidermidis</i> | Gram-positive    |                |
| Coagulase-negative staphylococci, Others                             | Gram-positive    |                |
| Coagulase-negative staphylococci, Unknown                            | Gram-positive    |                |
| Culture negative                                                     | Culture Negative |                |
| <i>Diphtheroids</i> ( <i>Corynebacterium</i> )                       | Gram-positive    |                |
| <i>E. coli</i>                                                       | Gram-negative    | x              |
| <i>Enterobacter</i> species                                          | Gram-negative    | x              |
| <i>Enterococcus</i> ( <i>Streptococcus faecalis/faecium</i> )        | Gram-positive    | x              |
| Fungi/Yeast, Others                                                  | Yeast            |                |
| Gram-negative organisms, Others                                      | Gram-negative    | x              |
| Gram-negative organisms, Unknown                                     | Gram-negative    | x              |
| Gram-positive organisms, Unknown                                     | Gram-positive    |                |
| Gram-positive organisms, Others                                      | Gram-positive    |                |
| <i>Klebsiella</i> species                                            | Gram-negative    | x              |
| <i>Morganella</i> species                                            | Gram-negative    | x              |
| <i>Mycobacterium</i> , Others                                        | Other            |                |
| <i>Mycobacterium tuberculosis</i>                                    | Other            |                |
| <i>Neisseria</i> species                                             | Gram-negative    | x              |
| Other enterobacteria (Coliforms)                                     | Gram-negative    | x              |
| <i>Pasteurella</i> species                                           | Gram-negative    | x              |
| <i>Proteus</i> species                                               | Gram-negative    | x              |
| <i>Pseudomonas aeruginosa</i>                                        | Gram-negative    | x              |
| <i>Pseudomonas cepacia</i>                                           | Gram-negative    | x              |
| <i>Pseudomonas stutzeri</i>                                          | Gram-negative    | x              |
| <i>Pseudomonas</i> , Others                                          | Gram-negative    | x              |
| <i>Pseudomonas</i> , Unknown                                         | Gram-negative    | x              |

|                                                                                             |               |   |
|---------------------------------------------------------------------------------------------|---------------|---|
| <i>Serratia</i> species                                                                     | Gram-negative | x |
| <i>Staphylococcus aureus</i> , Methicillin-resistant                                        | Gram-positive |   |
| <i>Staphylococcus aureus</i> , non-MRSA                                                     | Gram-positive |   |
| <i>Staphylococcus aureus</i> , Unknown sensitivity                                          | Gram-positive |   |
| <i>Stenotrophomonas maltophilia</i>                                                         | Gram-negative | x |
| <i>Streptococcus viridians</i> group ( <i>sanguis</i> , <i>bovis</i> , <i>mitis</i> , etc.) | Gram-positive |   |
| <i>Streptococcus</i> , Others                                                               | Gram-positive |   |
| <i>Streptococcus</i> , Unknown                                                              | Gram Positive |   |

**Figures**

**Supplemental Figure 1:** Sensitivity analysis with censoring baseline non-users at treatment initiation and baseline users at treatment discontinuation.

**A. Censor at treatment discontinuation. B. Censor at treatment initiation.**

## Association between GAS and outcomes censor at medication discontinuation

Figure S1A

Hazard Ratio (95% CI)

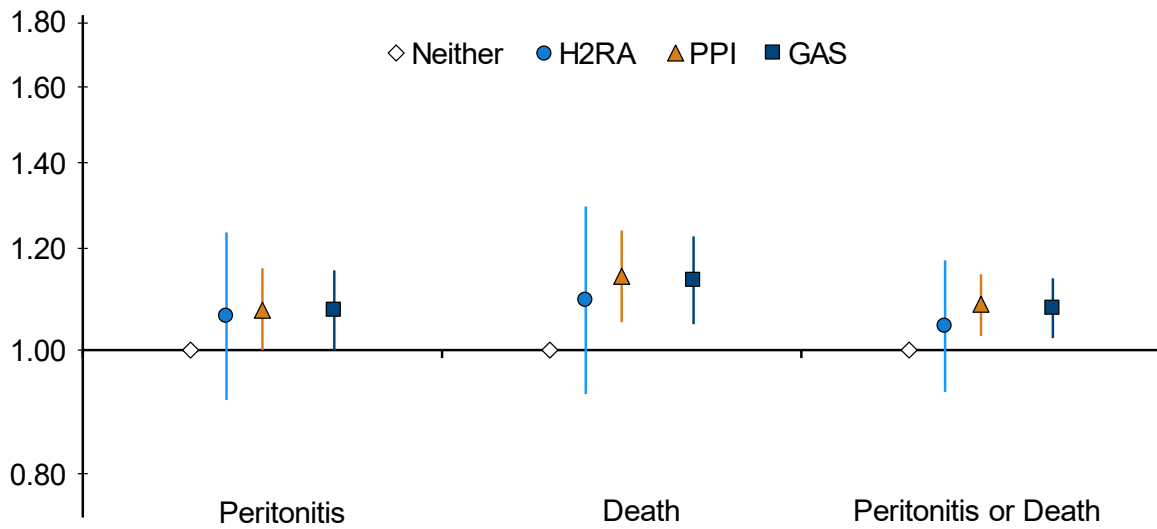

# Association between GAS and outcomes censor at medication initiation

Figure S1B

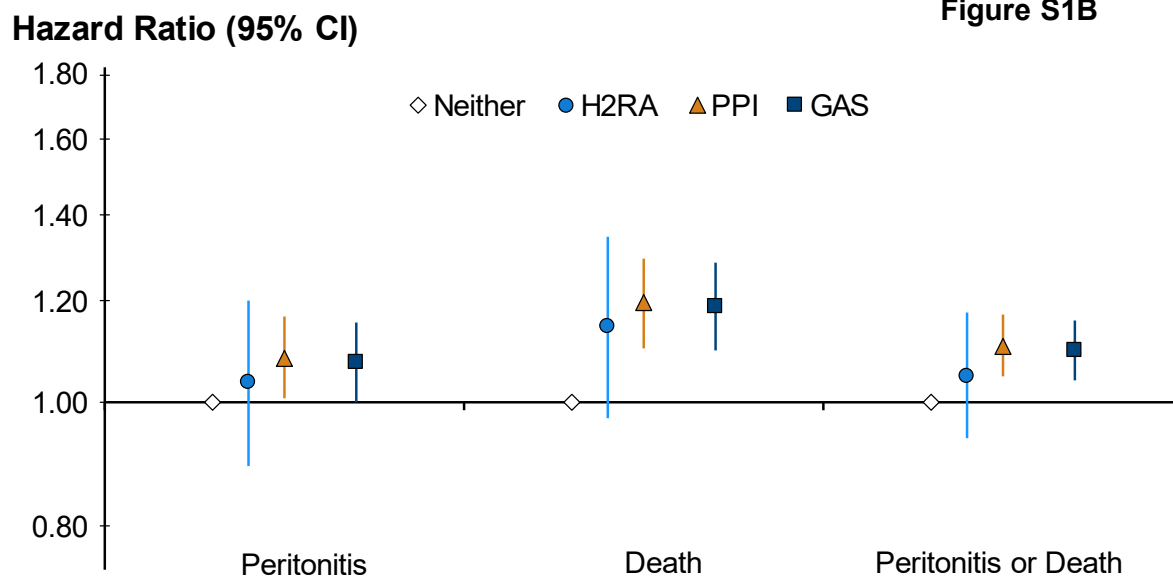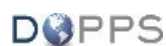

## Abbreviations:

GAS, gastric acid suppressants; H2RA, histamine 2 receptor antagonist; PPI, proton pump inhibitor

Peritonitis: patients: n=22287, events: n=3682; 6% of patients on H2RA, 25% PPI, 69% neither. Mortality: patients: n=23487, events: n=2906; 6% of patients on H2RA, 25% PPI, 69% neither. Model 1 adjusted for patient age, sex, black race, PD vintage, PD modality; model 2 adjusted for model 1 + 12 comorbidities; model 3 adjusted for model 2 + serum albumin, 24-hour urine volume, potassium, and magnesium; model 4 adjusted for model 3 + GI comorbidities. The overall GAS was estimated from a separate model.

**Supplemental Figure 2:** Association between gastric acid suppression use and peritonitis, subgroup analysis. Cox model stratified by country, US EHR source, and phase, adjusted for patient age, sex, black race, PD vintage, PD modality, 13 comorbidities, serum albumin, 24-hour urine volume, potassium, and magnesium.

**Subgroups**

**Figure S2**

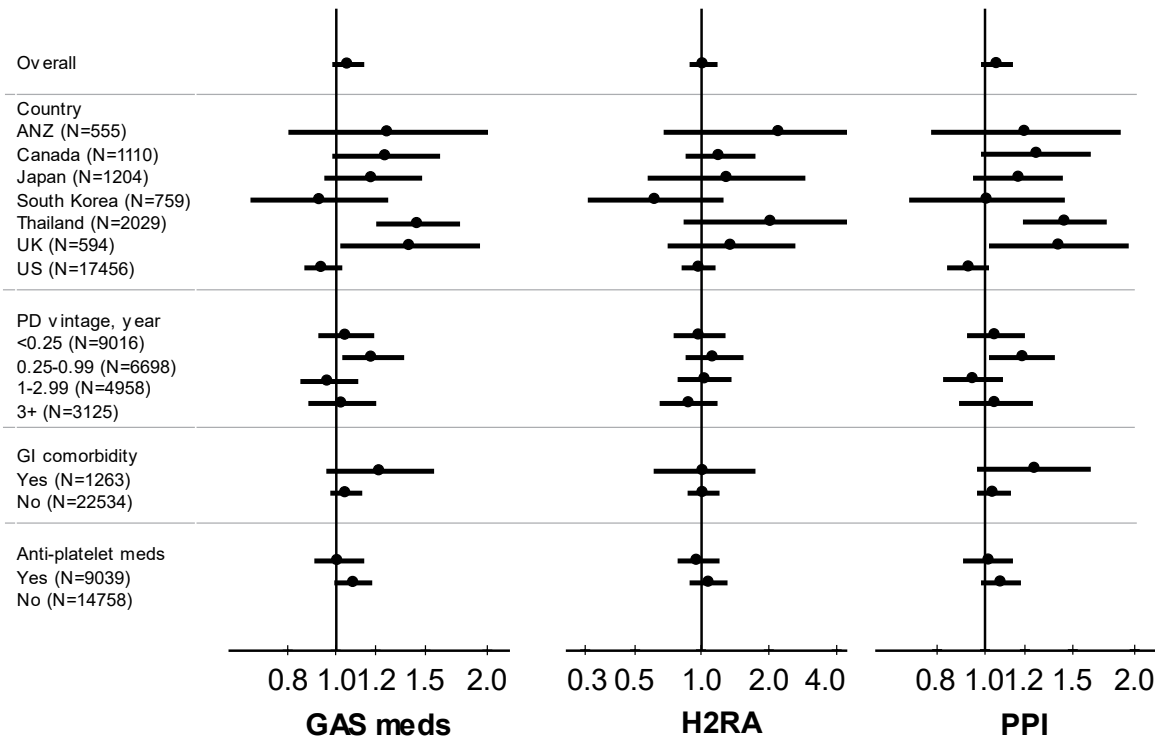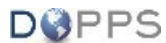

**Adjusted Hazard Ratio (95% CI)**

**Abbreviations:** GAS, gastric acid suppressants; H2RA, histamine 2 receptor antagonist; PPI, proton pump inhibitor; CAPD, continuous ambulatory peritoneal dialysis; APD, automated peritoneal dialysis.
